# Supplementary figures and images for: Long-Term Evolution of Quality of Life and Symptoms Following Surgical Treatment for Endometriosis: Different Trajectories for Which Patients?
Source: MDPI journal article supplement (doi:10.3390/jcm9082461), 2020-07-31

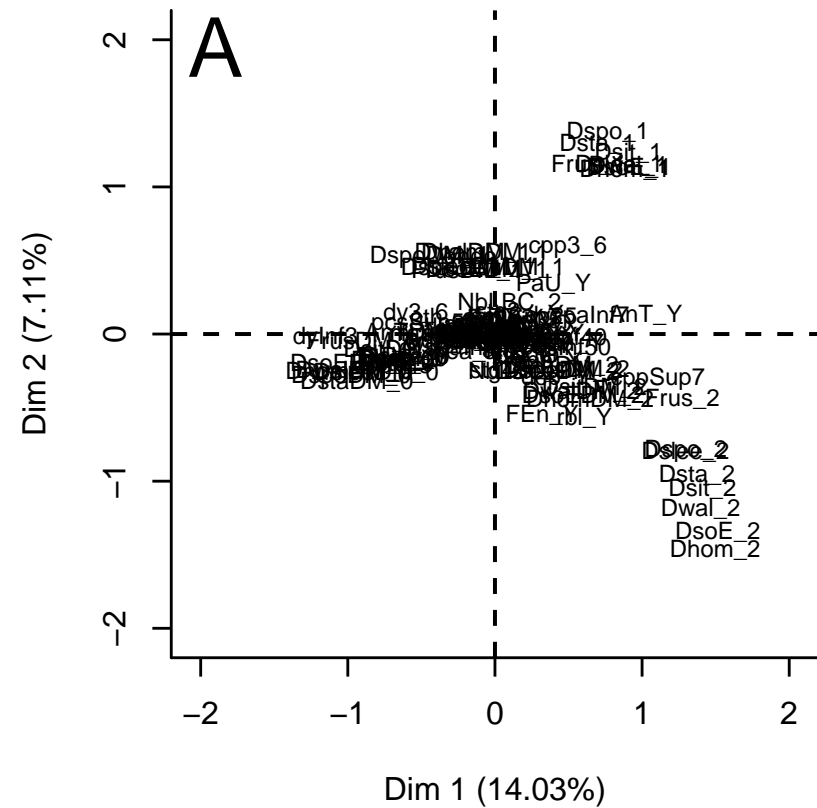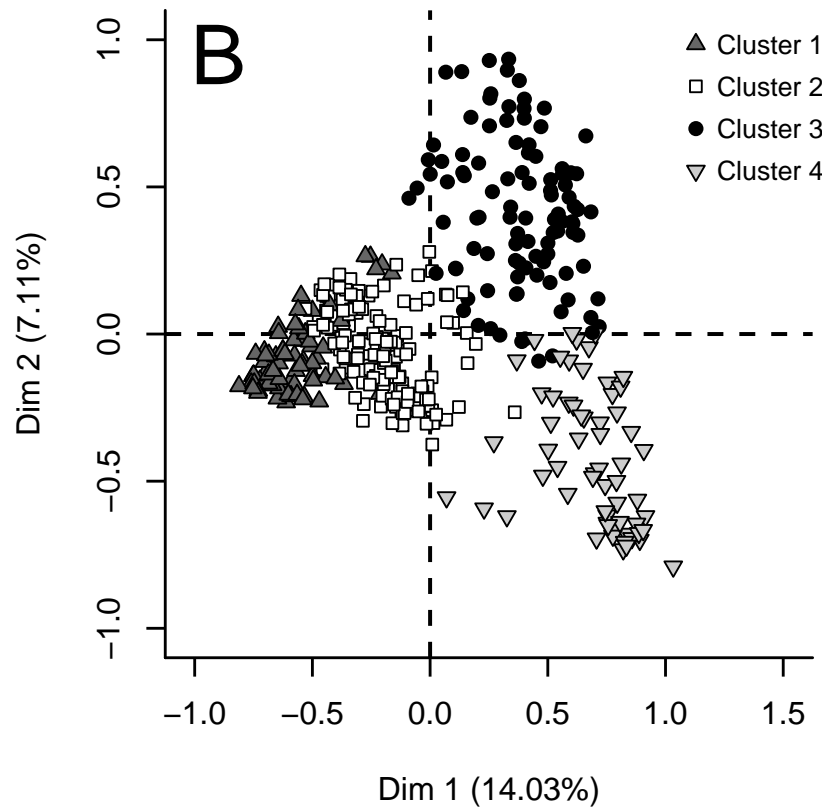

Supplement: s1 [file s1]
